# Supplementary material for: Flow-Based Chemiluminescence Microarrays as Screening Platform for Affinity Binders to Capture and Elute Bacteria
Source: MDPI journal article supplement (doi:10.3390/s22228606), 2022-11-08
Supplement: s1 [file s1]

## Supplementary information

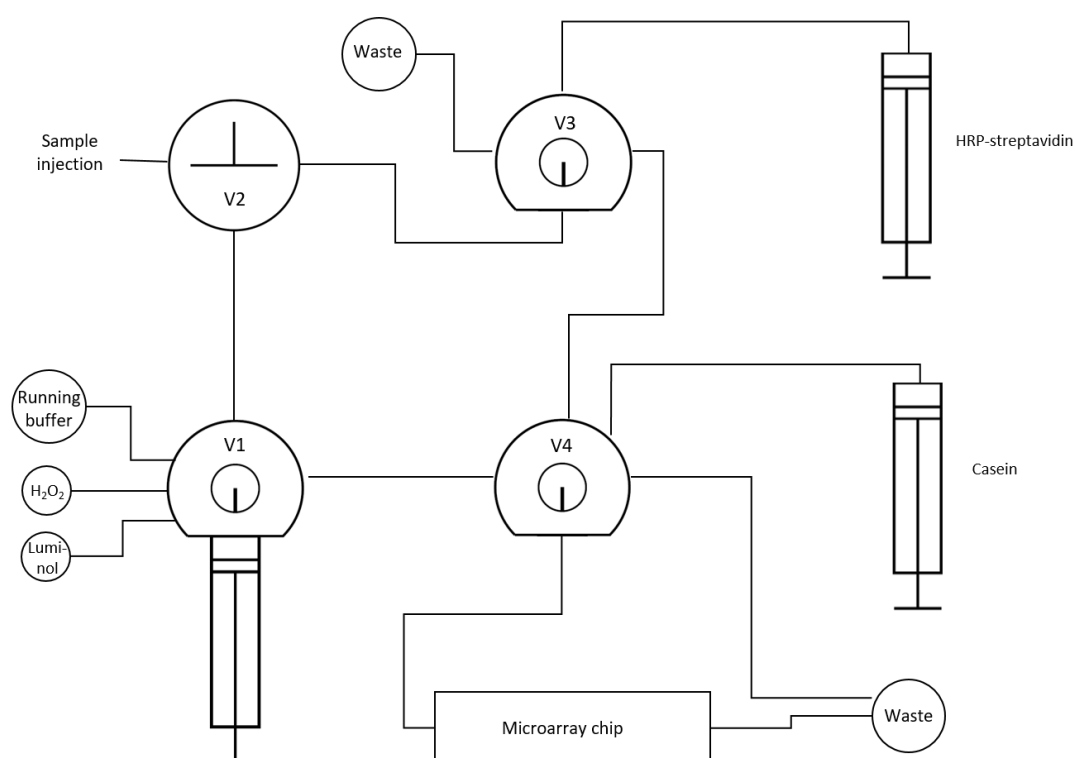

**Figure S1:** Schematic fluidic plan of the MCR-R. The positions and lengths of the tubing is just for demonstration purposes.

**Table S1:** Pathway for reagents during the measuring program on the MCR-R.

| Process                    | Pathway                                                   |
|----------------------------|-----------------------------------------------------------|
| Sample                     | Running buffer – V1 – V2– V3 – V4 – Chip – Waste          |
| Wash chip                  | Running buffer – V1 – V2– V3 – V4 – Chip – Waste          |
| Blocking                   | Casein – V4 – Chip – Waste                                |
| HRP-streptavidin           | HRP-streptavidin – V3 – V4 – Chip – Waste                 |
| CL-reagents                | Hydrogen peroxide – V1 + Luminol – V1 – V4 – Chip – Waste |
| Flush device “Sample way”  | Running buffer – V1 – V2 – V3 – V4 – Waste                |
| Flush device “Sample loop” | Running buffer – V1 – V2 – V3 – Waste                     |
| Flush device “Chip”        | Running buffer – V1 – V4 – Chip – Waste                   |
